# Supplementary material for: The Role of Obesity Training in Medical School and Residency on Bariatric Surgery Knowledge in Primary Care Physicians
Source: PubMed Central journal article supplement (PMC4539067; doi:10.1155/2015/841249), 2015-08-03

Supplemental Figure 1

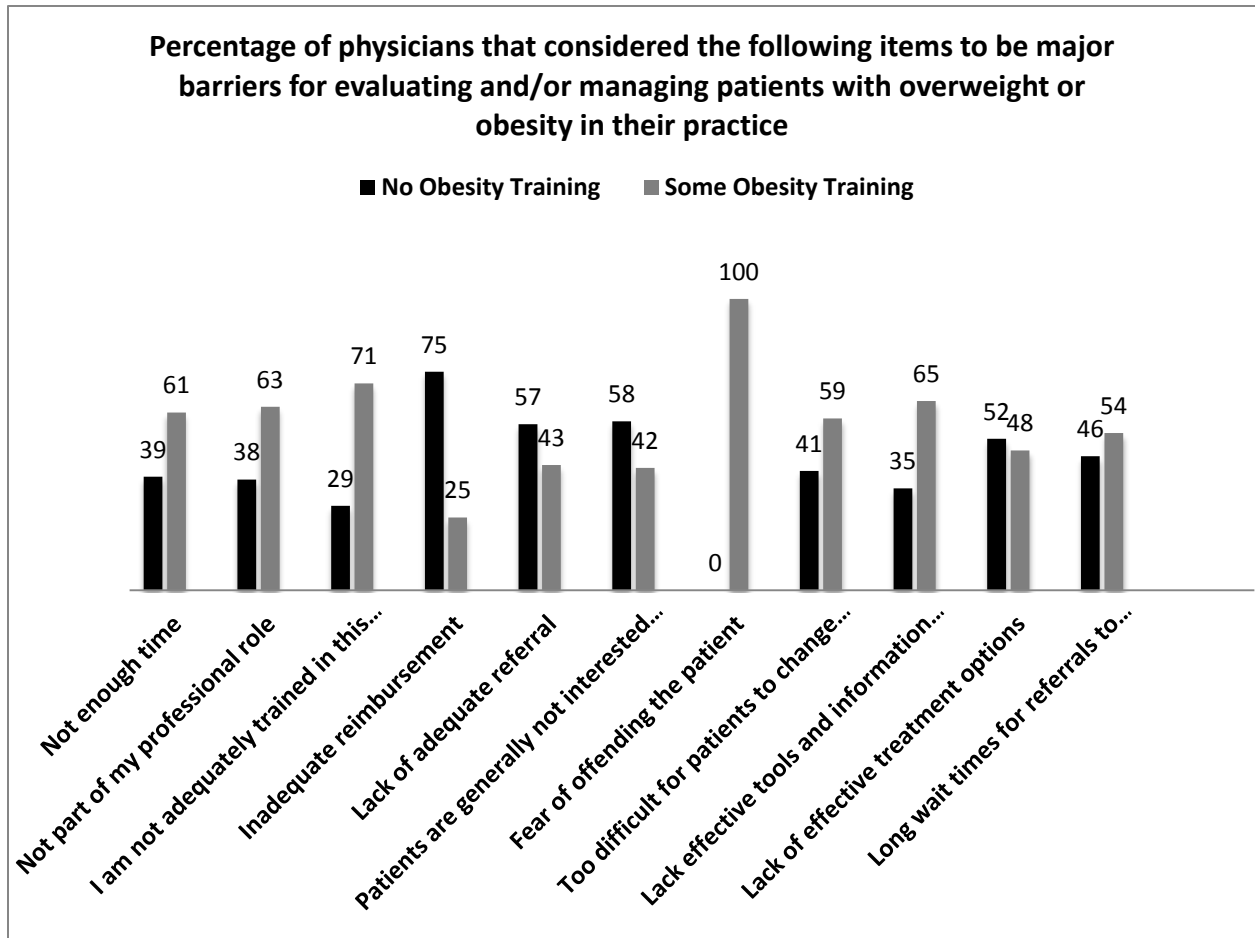

**Supplemental Figure 2**

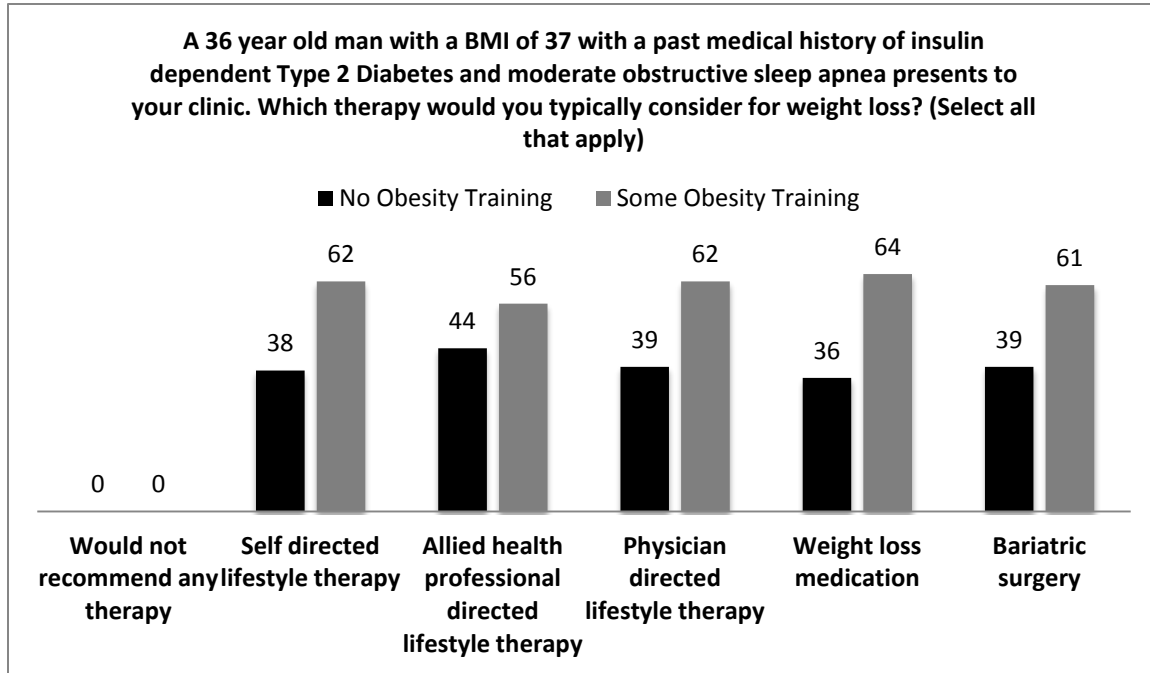

**Supplemental Figure 3**

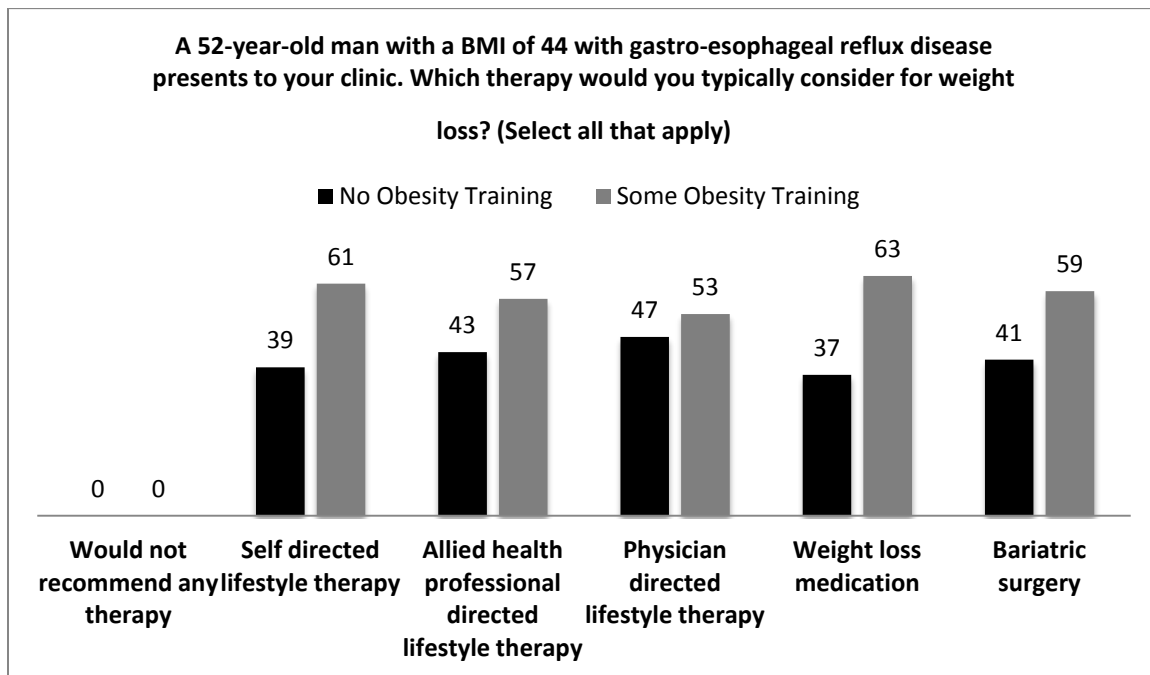

### Supplemental Figure 4

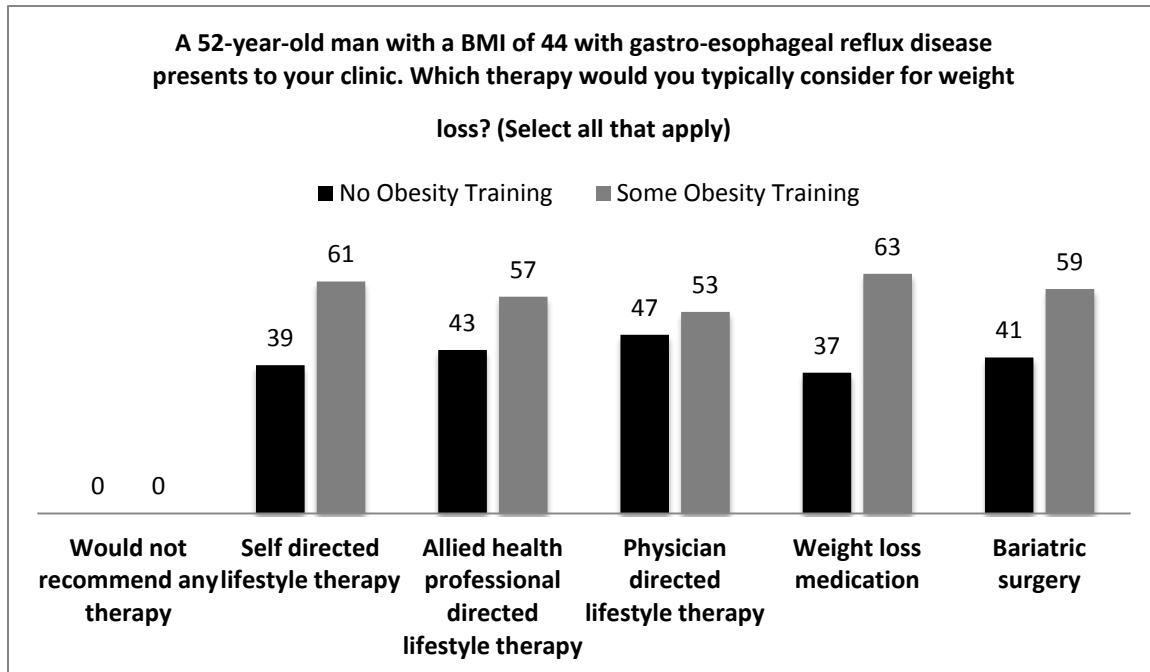

Supplement: 841249.f1.pdf [file 841249.f1.pdf]
